# Supplementary material for: Genome-Wide Linkage Disequilibrium in Nine-Spined Stickleback Populations
Source: PubMed Central journal article supplement (PMC4199698; doi:10.1534/g3.114.013334), 2014-08-12
Supplement: supp_g3.114.013334_TableS1.pdf [file supp_g3.114.013334_TableS1.pdf]

**Table S1** The number and proportion of rare alleles (allele frequency < 0.05) in 13 nine-spined stickleback populations

using 109 microsatellite markers.

| Population | Total number of alleles | The number of rare alleles | Proportion of rare alleles |
|------------|-------------------------|----------------------------|----------------------------|
| Hel (M)    | 760                     | 399                        | 0.53                       |
| Sbol (M)   | 757                     | 392                        | 0.52                       |
| Lev (M)    | 765                     | 395                        | 0.52                       |
| Kro (L)    | 647                     | 267                        | 0.41                       |
| Ska (L)    | 266                     | 45                         | 0.17                       |
| Por (L)    | 397                     | 159                        | 0.40                       |
| L1 (L)     | 266                     | 68                         | 0.26                       |
| Rah (L)    | 524                     | 245                        | 0.47                       |
| Byn (P)    | 240                     | 39                         | 0.16                       |
| Pyo (P)    | 164                     | 25                         | 0.15                       |
| Rbol (P)   | 656                     | 299                        | 0.46                       |
| Ryt (P)    | 253                     | 62                         | 0.25                       |
| Mat (R)    | 507                     | 146                        | 0.29                       |

M, marine; L, lake; P, pond; R, river. The population abbreviations are defined in Table 1.
