# Supplementary material for: Genome-Wide Linkage Disequilibrium in Nine-Spined Stickleback Populations
Source: PubMed Central journal article supplement (PMC4199698; doi:10.1534/g3.114.013334), 2014-08-12
Supplement: supp_g3.114.013334_TableS4.pdf [file supp_g3.114.013334_TableS4.pdf]

**Table S4** Linkage disequilibrium estimates ( $r^2 \pm$  S.E.) for syntenic markers in nine-spined stickleback populations and habitat types

using 109 microsatellite markers.

| Data Set                        | Physical distance interval (Syntenic) |               |               |               |               | Overall<br>(Syntenic) |
|---------------------------------|---------------------------------------|---------------|---------------|---------------|---------------|-----------------------|
|                                 | 0-5 Mb                                | 5-10 Mb       | 10-15 Mb      | 15-20 Mb      | >20 Mb        |                       |
| Hel (M)                         | 0.031 (0.038)                         | 0.032 (0.034) | 0.028 (0.024) | 0.024 (0.017) | 0.037 (0.013) | 0.030 (0.033)         |
| Sbol (M)                        | 0.035 (0.042)                         | 0.033 (0.038) | 0.033 (0.033) | 0.029 (0.014) | 0.020 (0.010) | 0.033 (0.037)         |
| Lev (M)                         | 0.026 (0.018)                         | 0.038 (0.066) | 0.032 (0.032) | 0.041 (0.030) | 0.028 (0.018) | 0.032 (0.043)         |
| Kro (L)                         | 0.033 (0.028)                         | 0.035 (0.042) | 0.026 (0.022) | 0.022 (0.013) | 0.022 (0.011) | 0.032 (0.032)         |
| Ska (L)                         | 0.037 (0.032)                         | 0.048 (0.036) | 0.040 (0.041) | 0.059 (0.046) | 0.022 (0.012) | 0.041 (0.035)         |
| Por (L)                         | 0.030 (0.032)                         | 0.030 (0.057) | 0.021 (0.027) | 0.035 (0.034) | 0.034 (0.042) | 0.030 (0.042)         |
| L1 (L)                          | 0.052 (0.062)                         | 0.062 (0.158) | 0.085 (0.148) | 0.034 (0.028) | 0.011 (0.011) | 0.056 (0.107)         |
| Rah (L)                         | 0.036 (0.057)                         | 0.034 (0.094) | 0.037 (0.043) | 0.033 (0.038) | 0.082 (0.065) | 0.036 (0.069)         |
| Byn (P)                         | 0.035 (0.035)                         | 0.066 (0.097) | 0.077 (0.121) | 0.034 (0.031) | 0.015 (0.009) | 0.050 (0.076)         |
| Pyo (P)                         | 0.045 (0.044)                         | 0.131 (0.307) | 0.008 (0.008) | 0.013 (0.004) | —             | 0.065 (0.167)         |
| Rbol (P)                        | 0.029 (0.026)                         | 0.045 (0.084) | 0.034 (0.033) | 0.027 (0.014) | 0.029 (0.012) | 0.035 (0.054)         |
| Ryt (P)                         | 0.046 (0.062)                         | 0.049 (0.144) | 0.036 (0.046) | 0.047 (0.035) | 0.013 (0.010) | 0.046 (0.094)         |
| Mat (R)                         | 0.041 (0.049)                         | 0.038 (0.042) | 0.046 (0.051) | 0.031 (0.022) | 0.035 (0.022) | 0.040 (0.045)         |
| Marine (average <sup>a</sup> )  | 0.031 (0.005)                         | 0.034 (0.003) | 0.031 (0.003) | 0.031 (0.009) | 0.028 (0.009) | 0.032 (0.002)         |
| Lake (average <sup>a</sup> )    | 0.038 (0.009)                         | 0.042 (0.013) | 0.042 (0.025) | 0.037 (0.014) | 0.034 (0.028) | 0.039 (0.010)         |
| Pond (average <sup>a</sup> )    | 0.039 (0.008)                         | 0.073 (0.040) | 0.039 (0.029) | 0.030 (0.014) | 0.019 (0.009) | 0.049 (0.012)         |
| CF (average <sup>a</sup> )      | 0.034 (0.006)                         | 0.039 (0.005) | 0.035 (0.010) | 0.027 (0.005) | 0.029 (0.007) | 0.036 (0.004)         |
| Marine (combined <sup>b</sup> ) | 0.014 (0.017)                         | 0.016 (0.024) | 0.015 (0.017) | 0.012 (0.013) | 0.010 (0.008) | 0.014 (0.019)         |
| Lake (combined <sup>b</sup> )   | 0.035 (0.043)                         | 0.035 (0.066) | 0.036 (0.044) | 0.034 (0.031) | 0.021 (0.024) | 0.035 (0.051)         |
| Pond (combined <sup>b</sup> )   | 0.057 (0.073)                         | 0.069 (0.087) | 0.068 (0.088) | 0.085 (0.129) | 0.042 (0.058) | 0.064 (0.084)         |
| CF (combined <sup>b</sup> )     | 0.024 (0.043)                         | 0.020 (0.022) | 0.026 (0.023) | 0.018 (0.011) | 0.014 (0.010) | 0.022 (0.033)         |
| River                           | 0.041 (0.049)                         | 0.038 (0.042) | 0.046 (0.051) | 0.031 (0.022) | 0.035 (0.022) | 0.040 (0.045)         |

M, marine; L, lake; P, pond; R, river; CF, Coastal freshwater, including Kro, Rbol and Mat. The population abbreviations are defined

in Table 1.

<sup>a</sup> $r^2$  value is obtained from the averaged  $r^2$  value of relevant populations.

<sup>b</sup> $r^2$  value is calculated from the combined original haplotype data of relevant populations.
