# Supplementary material for: Genome-Wide Linkage Disequilibrium in Nine-Spined Stickleback Populations
Source: PubMed Central journal article supplement (PMC4199698; doi:10.1534/g3.114.013334), 2014-08-12
Supplement: supp_g3.114.013334_TableS5.pdf [file supp_g3.114.013334_TableS5.pdf]

**Table S5** Results of Pearson's and Kendall's correlation tests between  $D'$  and  $r^2$  values in nine-spined stickleback

populations and habitat types.

| Population             | Pearson's correlation coefficient | Kendall's correlation coefficient |
|------------------------|-----------------------------------|-----------------------------------|
| Hel (M)                | 0.178**                           | 0.277**                           |
| Sbol (M)               | 0.180**                           | 0.175**                           |
| Lev (M)                | 0.265**                           | 0.263**                           |
| Kro (L)                | 0.291**                           | 0.307**                           |
| Ska (L)                | 0.160                             | 0.175*                            |
| Por (L)                | 0.117                             | 0.105*                            |
| L1 (L)                 | 0.317**                           | 0.371**                           |
| Rah (L)                | 0.149*                            | 0.081                             |
| Byn (P)                | 0.244**                           | 0.265**                           |
| Pyo (P)                | 0.106                             | -0.146                            |
| Rbol (P)               | 0.231**                           | 0.279**                           |
| Ryt (P)                | 0.176*                            | 0.218**                           |
| Mat (R)                | 0.263**                           | 0.282**                           |
| Marine (combined data) | 0.172**                           | 0.195**                           |
| Lake (combined data)   | 0.274**                           | 0.234**                           |
| Pond (combined data)   | 0.449**                           | 0.417**                           |
| CF (combined data)     | 0.286**                           | 0.304**                           |
| River                  | 0.263**                           | 0.282**                           |

\* $P < 0.05$ , \*\* $P < 0.01$ . M, marine; L, lake; P, pond; R, river; CF, Coastal freshwater, including Kro, Rbol and Mat. The

population abbreviations are defined in Table 1.
