# Supplementary material for: Genome-Wide Linkage Disequilibrium in Nine-Spined Stickleback Populations
Source: PubMed Central journal article supplement (PMC4199698; doi:10.1534/g3.114.013334), 2014-08-12
Supplement: supp_g3.114.013334_TableS6.pdf [file supp_g3.114.013334_TableS6.pdf]

**Table S6** Logarithmic function describing the relationship between genome-wide LD (measured by  $D'$ ) and genomic distance (Mb) together with the explanatory power ( $R^2$ ) and statistical significance ( $P$ ) in 13 nine-spined stickleback populations and five habitat types (marine, lake, pond, river and coastal freshwater) using 109 microsatellite loci.

| Population         | Logarithmic function         | $R^2$  | $P$     |
|--------------------|------------------------------|--------|---------|
| Hel (M)            | $y = -0.0113\ln(x) + 0.5603$ | 0.0038 | 0.2357  |
| Sbol (M)           | $y = -0.0134\ln(x) + 0.5728$ | 0.0062 | 0.1668  |
| Lev (M)            | $y = -0.0034\ln(x) + 0.5747$ | 0.0004 | 0.74    |
| Kro (L)            | $y = -0.022\ln(x) + 0.524$   | 0.0168 | 0.0173* |
| <b>Ska (L)</b>     | $y = 0.0205\ln(x) + 0.6013$  | 0.0072 | 0.4387  |
| Por (L)            | $y = -0.0001\ln(x) + 0.6477$ | 0.0000 | 0.9913  |
| L1 (L)             | $y = -0.0315\ln(x) + 0.5463$ | 0.0182 | 0.0817  |
| Rah (L)            | $y = -0.0054\ln(x) + 0.671$  | 0.0007 | 0.7054  |
| <b>Byn (P)</b>     | $y = 0.0382\ln(x) + 0.5463$  | 0.0217 | 0.116   |
| <b>Pyo (P)</b>     | $y = 0.0538\ln(x) + 0.7105$  | 0.0387 | 0.2575  |
| Rbol (P)           | $y = -0.0101\ln(x) + 0.5659$ | 0.0034 | 0.3011  |
| Ryt (P)            | $y = -0.0173\ln(x) + 0.6348$ | 0.0063 | 0.3342  |
| Mat (R)            | $y = -0.0135\ln(x) + 0.5467$ | 0.0054 | 0.2037  |
| Marine             | $y = -0.0178\ln(x) + 0.4543$ | 0.0129 | 0.0338* |
| Lake               | $y = -0.0099\ln(x) + 0.5053$ | 0.005  | 0.2067  |
| Pond               | $y = -0.0067\ln(x) + 0.56$   | 0.0015 | 0.5276  |
| River              | $y = -0.0135\ln(x) + 0.5467$ | 0.0054 | 0.2037  |
| Coastal freshwater | $y = -0.01\ln(x) + 0.404$    | 0.013  | 0.0386* |

Population name in bold type indicates the population has an increasing trend. \* $P < 0.05$ . M, marine; L, lake; P, pond;

R, river. The population abbreviations are defined in Table 1.
