# Supplementary material for: Genome-Wide Linkage Disequilibrium in Nine-Spined Stickleback Populations
Source: PubMed Central journal article supplement (PMC4199698; doi:10.1534/g3.114.013334), 2014-08-12
Supplement: supp_g3.114.013334_TableS7.pdf [file supp_g3.114.013334_TableS7.pdf]

**Table S7** The number of microsatellite marker pairs in each distance bin (according to Table 3) for 13 nine-spined stickleback

populations and five habitat types (marine, lake, pond, river and coastal freshwater).

| Data Set           | Physical distance interval (Syntenic) |         |          |          |        | Overall<br>(Syntenic) |
|--------------------|---------------------------------------|---------|----------|----------|--------|-----------------------|
|                    | 0-5 Mb                                | 5-10 Mb | 10-15 Mb | 15-20 Mb | >20 Mb |                       |
| Hel (M)            | 144                                   | 109     | 50       | 20       | 7      | 330                   |
| Sbol (M)           | 129                                   | 101     | 49       | 20       | 7      | 306                   |
| Lev (M)            | 131                                   | 102     | 45       | 20       | 7      | 305                   |
| Kro (L)            | 136                                   | 103     | 46       | 19       | 5      | 309                   |
| Ska (L)            | 42                                    | 21      | 14       | 4        | 4      | 85                    |
| Por (L)            | 106                                   | 81      | 30       | 16       | 6      | 239                   |
| L1 (L)             | 93                                    | 52      | 16       | 9        | 3      | 173                   |
| Rah (L)            | 112                                   | 81      | 34       | 17       | 5      | 249                   |
| Byn (P)            | 47                                    | 36      | 16       | 10       | 6      | 115                   |
| Pyo (P)            | 20                                    | 10      | 2        | 3        | 0      | 35                    |
| Rbol (P)           | 137                                   | 105     | 46       | 20       | 7      | 315                   |
| Ryt (P)            | 73                                    | 48      | 16       | 9        | 3      | 149                   |
| Mat (R)            | 136                                   | 107     | 45       | 20       | 7      | 315                   |
| Marine             | 146                                   | 111     | 50       | 20       | 7      | 334                   |
| Lake               | 139                                   | 107     | 46       | 20       | 7      | 319                   |
| Pond               | 137                                   | 105     | 46       | 20       | 7      | 315                   |
| River              | 136                                   | 107     | 45       | 20       | 7      | 315                   |
| Coastal freshwater | 145                                   | 113     | 46       | 20       | 7      | 331                   |

M, marine; L, lake; P, pond; R, river. The population abbreviations are defined in Table 1.
