# Supplementary material for: Genome-Wide Linkage Disequilibrium in Nine-Spined Stickleback Populations
Source: PubMed Central journal article supplement (PMC4199698; doi:10.1534/g3.114.013334), 2014-08-12
Supplement: supp_g3.114.013334_TableS8.pdf [file supp_g3.114.013334_TableS8.pdf]

**Table S8** Summary of linkage disequilibrium estimates ( $\pm$  S.E.) for syntenic markers in nine-spined stickleback populations and habitat types with both

haplotypic and genotypic data and either including or excluding rare alleles using 109 microsatellite markers.

| Data Set                        | Hap ( $D'$ , MAF 0.05) | Hap ( $r^2$ , MAF 0.05) | Comp ( $D'$ ) | Comp ( $D'$ , MAF 0.05) | Comp ( $r^2$ ) | Comp ( $r^2$ , MAF 0.05) |
|---------------------------------|------------------------|-------------------------|---------------|-------------------------|----------------|--------------------------|
| Hel (M)                         | 0.410 (0.219)          | 0.044 (0.044)           | 0.693 (0.191) | 0.468 (0.233)           | 0.206 (0.059)  | 0.281 (0.133)            |
| Sbol (M)                        | 0.410 (0.200)          | 0.051 (0.055)           | 0.678 (0.204) | 0.482 (0.234)           | 0.206 (0.064)  | 0.290 (0.141)            |
| Lev (M)                         | 0.487 (0.255)          | 0.048 (0.072)           | 0.685 (0.183) | 0.491 (0.242)           | 0.205 (0.057)  | 0.280 (0.135)            |
| Kro (L)                         | 0.411 (0.222)          | 0.042 (0.041)           | 0.595 (0.203) | 0.414 (0.199)           | 0.204 (0.062)  | 0.248 (0.099)            |
| Ska (L)                         | 0.495 (0.273)          | 0.048 (0.035)           | 0.559 (0.250) | 0.405 (0.232)           | 0.208 (0.085)  | 0.240 (0.119)            |
| Por (L)                         | 0.447 (0.295)          | 0.038 (0.036)           | 0.681 (0.269) | 0.424 (0.269)           | 0.197 (0.098)  | 0.245 (0.153)            |
| L1 (L)                          | 0.446 (0.289)          | 0.067 (0.122)           | 0.461 (0.237) | 0.369 (0.205)           | 0.223 (0.121)  | 0.244 (0.140)            |
| Rah (L)                         | 0.489 (0.257)          | 0.053 (0.091)           | 0.729 (0.223) | 0.504 (0.250)           | 0.204 (0.105)  | 0.297 (0.158)            |
| Byn (P)                         | 0.512 (0.325)          | 0.062 (0.088)           | 0.474 (0.281) | 0.335 (0.217)           | 0.186 (0.107)  | 0.199 (0.123)            |
| Pyo (P)                         | 0.706 (0.331)          | 0.084 (0.212)           | 0.625 (0.350) | 0.450 (0.363)           | 0.199 (0.173)  | 0.227 (0.214)            |
| Rbol (P)                        | 0.450 (0.230)          | 0.048 (0.071)           | 0.641 (0.207) | 0.475 (0.227)           | 0.209 (0.062)  | 0.271 (0.136)            |
| Ryt (P)                         | 0.421 (0.293)          | 0.046 (0.058)           | 0.525 (0.297) | 0.356 (0.213)           | 0.206 (0.117)  | 0.222 (0.128)            |
| Mat (R)                         | 0.443 (0.233)          | 0.046 (0.053)           | 0.563 (0.221) | 0.405 (0.187)           | 0.212 (0.081)  | 0.236 (0.093)            |
| Marine (average <sup>a</sup> )  | 0.436 (0.044)          | 0.048 (0.004)           | 0.685 (0.008) | 0.480 (0.012)           | 0.206 (0.001)  | 0.284 (0.006)            |
| Lake (average <sup>a</sup> )    | 0.458 (0.035)          | 0.050 (0.011)           | 0.605 (0.105) | 0.423 (0.050))          | 0.207 (0.010)  | 0.255 (0.024)            |
| Pond (average <sup>a</sup> )    | 0.522 (0.128)          | 0.060 (0.018)           | 0.566 (0.080) | 0.404 (0.069)           | 0.200 (0.010)  | 0.230 (0.030)            |
| CF (average <sup>a</sup> )      | 0.435 (0.021)          | 0.045 (0.003)           | 0.600 (0.039) | 0.431 (0.038)           | 0.208 (0.004)  | 0.252 (0.018)            |
| Marine (combined <sup>b</sup> ) | 0.300 (0.183)          | 0.024 (0.033)           | 0.683 (0.166) | 0.347 (0.195)           | 0.123 (0.032)  | 0.206 (0.121)            |
| Lake (combined <sup>b</sup> )   | 0.451 (0.207)          | 0.060 (0.071)           | 0.707 (0.154) | 0.491 (0.195)           | 0.148 (0.060)  | 0.269 (0.118)            |
| Pond (combined <sup>b</sup> )   | 0.574 (0.264)          | 0.124 (0.141)           | 0.688 (0.176) | 0.608 (0.256)           | 0.182 (0.078)  | 0.349 (0.184)            |
| CF (combined <sup>b</sup> )     | 0.306 (0.148)          | 0.028 (0.038)           | 0.623 (0.188) | 0.324 (0.178)           | 0.130 (0.038)  | 0.189 (0.091)            |
| River                           | 0.443 (0.233)          | 0.046 (0.053)           | 0.563 (0.221) | 0.405 (0.187)           | 0.212 (0.081)  | 0.236 (0.093)            |

M, marine; L, lake; P, pond; R, river; CF, Coastal freshwater, including Kro, Rbol and Mat. Hap, haplotypic LD measures; Comp, Composite LD measures.

MAF 0.05 = minor alleles with frequency less than 5% were excluded from the LD analyses. The population abbreviations are defined in Table 1.

<sup>a</sup> $D'$  or  $r^2$  value is obtained from the averaged  $D'$  or  $r^2$  value of relevant populations.

<sup>b</sup> $D'$  or  $r^2$  value is calculated from the combined original haplotype (for Hap) or genotype (for Comp) data of relevant populations.
